# Supplementary material for: Pregnant women, their male partners and health care providers’ perceptions of HIV self-testing in Kampala, Uganda: Implications for integration in prevention of mother-to-child transmission programs and scale-up
Source: PubMed Central journal article supplement (PMC8241041; doi:10.1371/journal.pone.0253616), 2021-06-29
Supplement: pone.0253616.s002.pdf [file pone.0253616.s002.pdf]

## **EBIBUZO EBINAABUUZIBWA/EBINAABUKUBAGANYIZIBWAKO EBIROWOOZO MU KUNOONYEREZA OKUKWATA KU KUKEBERA AKAWUKA KAAMUKENENYA MU KAMPALA**

**Abeetabye mu kunoonnyereza** (Abakyala abayonsa n'abaami baabwe abeetaba mu kunoonnyereza okuyitibwa 'PRIMAL study', abakyala abali embuto nga tebalina kawuka kamukenenya abajja ku kiliniki y'abakyala abali embuto, abakyala abalina embuto nga balina akawuka kamukenenya abajja mu kiliniki y'abakyala abali embuto, abaami b'abakyala abali embuto abajja mu kiliniki y'abakyala abali embuto, abasawo abakola mu nteekateeka egenderera okuziyiza ba maama abali embuto okusiiga abaana baabwe akawuka kamukenenya n'abasawo abakola okunoonnyereza okuyitibwa 'PRIMAL study')

**Ekitundu 1: Ebikwata ku beetabye mu kubuuzibwa ebibuuzo:** Funa era wandiika ebintu ebikulu ebikwata ku beetabye mu kukubaganya ebirowoozo/okubuuzibwa ebibuuzo (emyaka, ekikula kyaabwe, ekiti eyeetabye mu kunoonnyereza mwaagwa (mwami wa mukyala, omukyala ajja mu kiliniki y'abakyala abali embuto/omukyala ali mu nteekateeka eya PMTCT oba Primal, disitulikiti gyebava, omutendera gw'obuyigirize, oba bafumbo, ne bbanga abasawo abakola mu nteekateeka eziyiza bamaama okusiiga abaana baabwe akawuka (PMTCT) lye bamaze mu nteekateeka eno).

**Ekitundu II: Okumanya ebifa ku kwekebeza akawuka kamukenenya n'ebirowoozebwa ku nteekateeka eno**

1. Biki ebiremesa abakyala okuleeta abaagalwa baabwe okukeberegwa akawuka kamukenenya mu kiseera nga bali mbuto/nga bayonsa?
2. Wali owulidde ko enkola eyomuntu kinomu kwekebera akawuka kamukenenya? Bwekiba kituufu, biki byewawulira ku kwekebeza kuno era wabiwulira kuvaawa?

**Wetegereze:** Eri abo abeetabye mu kukubaganya ebirowoozo nga tebawulirangako ku kwekebera kawuka kamukenenya, nnyonnyola okwekebera akawuka kamukenenya nga tukozesa amalusu (nga tonabuuzo bibuuzo birala). Eno y'engeri omuntu gyeyegyako amalusu, naagakebera era n'amannya ebivudde mu kukebera kuno. Abo abasaangibwa nga balina akawuka kamukenenya bateekeddwa okugenda mu ddwaliro okukola okwekebeza okukakassa kino n'okuweebwa amagezi ku kutandika okumira eddagala ly'akawuka kamukenenya.

3. Olowooza birungi ki ebinyinza okubeera mu omuntu kwekebera akawuka kamukenenya yeka? (Buza ku birungi ku bakyalala n'abaagalwa baabwe mu kiseera ng'abakyala bali mbuto ne mu kiseera eky'okuyoonsa, kukebera akawuka kamukenenya omulundi ogusoka oba kuddamu kukeberegwa bwebiba tebyogeddwa?)
4. Olowooza biki ebinyinza okulemesa abakyala n'abaagalwa baabwe okukozesa enkola ey'okwekebera akawuka kamukenenya?

5. Kiki ky'olwooza ku kugatta enkola eno ey'okwekebera akawuka kamukenenya n'enteekateeka ey'okuziyiza bamaama okusiiga abaana baabwe akawuka kaamukenenya eyitibwa PMTCT?
6. Kiki ekirina okukolebwa okutumbula enkola ey'okwekebera akawuka kaamukenenya mu kuddamu okwekebeza akawuka kano mu bakyala n'abaagalwa baabwe mu kiseera ng'abakyala bali mbutu ne mu kiseera eky'okuyoonsa?
7. Olina/Mulina ekirala kyemugamba?
8. Mwebale nnyo olw'obudde n'ebirowooza byamwe byemuwaddeyo
